# Supplementary material
Source: publisher site journal article supplement (https://www.degruyterbrill.com/publication/isbn/9783486718164/downloadAsset/9783486718164_Buchinformation.pdf)
Supplement: Supplementary file 1 [file 9783486718164_Buchinformation.pdf]

Oldenbourg Wissenschaftsverlag  
Pressereferat Geisteswissenschaften  
Rosenheimer Str. 145  
81671 München  
Telefon: 089/45051-211  
Fax: 089/45051-204  
presse-w@oldenbourg.de

## **Akten zur Auswärtigen Politik der Bundesrepublik Deutschland 1971**

Herausgegeben im Auftrag des Auswärtigen Amts vom Institut für Zeitgeschichte. Hauptherausgeber Hans-Peter Schwarz, Mitherausgeber Helga Haftendorn, Klaus Hildebrand, Werner Link, Horst Möller und Rudolf Morsey.

Bearbeitet von Martin Koopmann, Matthias Peter,  
Daniela Taschler  
Wissenschaftliche Leiterin: Ilse Dorothee Pautsch.

2002. 3 Bände, LXXXVIII, 2153 S., €178,-  
(Fortsetzungspreis €148,-)  
ISBN 978-3-486-56618-5

Im September 1971 reiste Bundeskanzler Brandt in die UdSSR. Die Gespräche mit Generalsekretär Breschnew auf der Krim, die von den Westmächten nicht ohne Misstrauen beobachtet wurden, markierten einen weiteren wichtigen Schritt in der Ausgestaltung der bilateralen Beziehungen ein Jahr nach Unterzeichnung des Moskauer Vertrags. Unversehens wurde der Kanzler jedoch mit dem sowjetischen Junktim zwischen der Ratifizierung des Moskauer Vertrags durch den Bundestag und der Unterzeichnung des Schlußprotokolls zu dem wenige Tage zuvor geschlossenen Vier-Mächte-Abkommen über Berlin konfrontiert. Damit drohte die in den Bonner Parteien ohnehin schon umstrittene Zustimmung zu den Ostverträgen noch schwieriger zu werden. Zudem konnten ohne eine Berlin-Regelung die Vorbereitungen für die Europäische Sicherheitskonferenz, auf die die Staaten des Warschauer Pakts, aber auch einige NATO-Partner zunehmend drängten, nicht beginnen. Darüber hinaus musste auch im Verhältnis beider deutscher Staaten zueinander ein Modus vivendi gefunden werden. In langwierigen Verhandlungen gelang es den Staatssekretären Bahr und Kohl mit dem Abkommen über den Transitverkehr von und nach Berlin (West), das am 17. Dezember unterzeichnet wurde, einen ersten Schritt in diese Richtung zu unternehmen.

## **Zur Edition:**

- Die Edition erscheint seit 1993 jährlich in zwei bis drei Bänden.
- Veröffentlicht wird bisher unzugängliches Material nach Ablauf der Sperrfrist von 30 Jahren, darunter auch Bestände, die als „geheim“ oder „streng geheim“ klassifiziert waren. Das Herausgebergremium trägt in wissenschaftlicher Unabhängigkeit die Verantwortung für Auswahl und Kommentierung der Akten. Die Edition unterscheidet sich dadurch maßgeblich von vergleichbaren Projekten in anderen Ländern.
- Die Dokumente sind in chronologischer Reihenfolge abgedruckt. Die Register des Dokumentenverzeichnisses, eine Zeittafel, die Personen- und Sachregister vereinfachen die Benutzung des Werkes. Aus der Kommentierung geht u.a. hervor, welche Beachtung das jeweils edierte Dokument auf den verschiedenen Entscheidungsebenen des Auswärtigen Amts bzw. außerhalb dieser Behörde gefunden hat.
